# Supplementary material
Source: MDPI journal article supplement (https://www.mdpi.com/2571-6255/6/2/77)
Supplement: s1 [file s1]

## Supplementary Materials

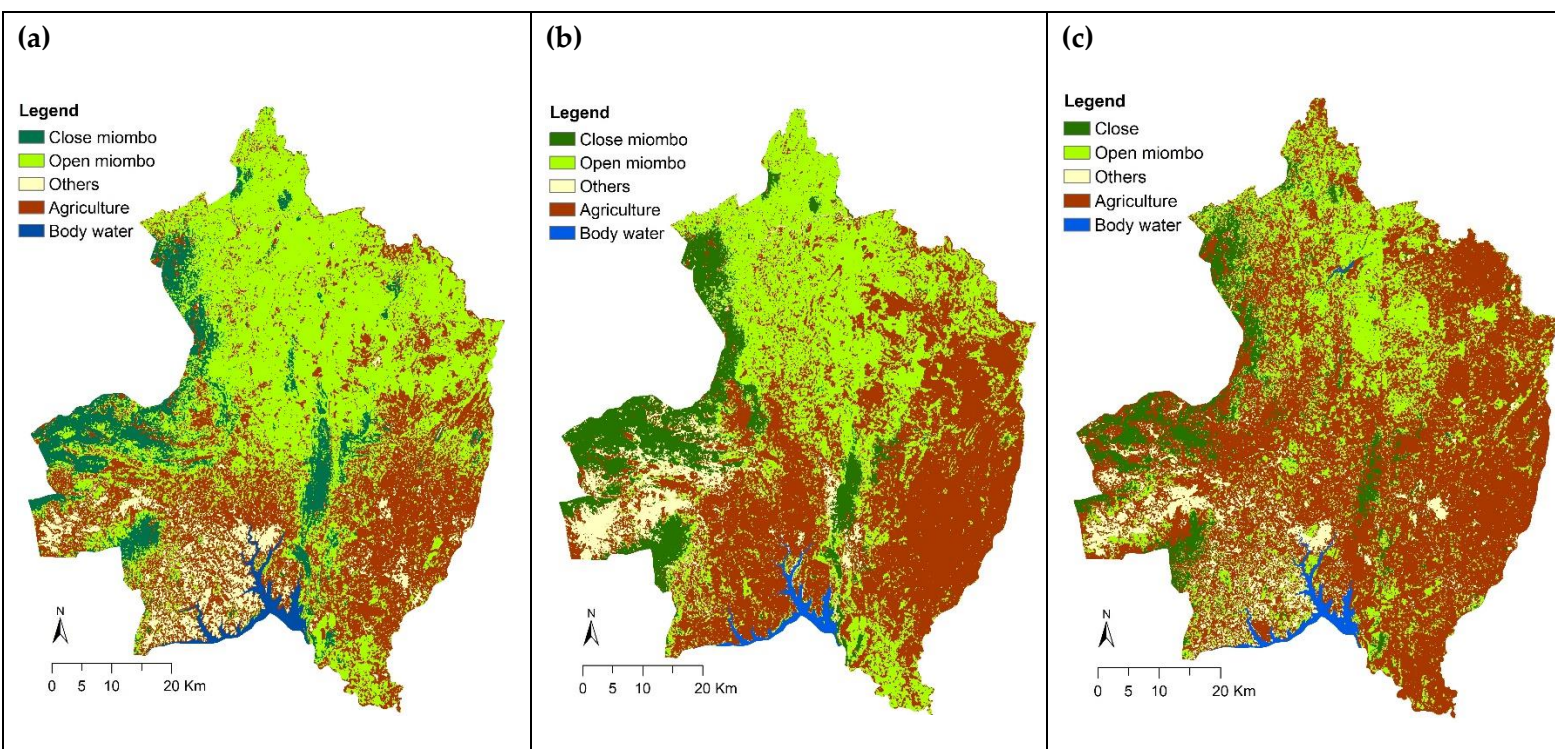

**Figure S1.** Land cover and land use maps of study area for 2001 (a), 2008 (b), and 2018 (c)

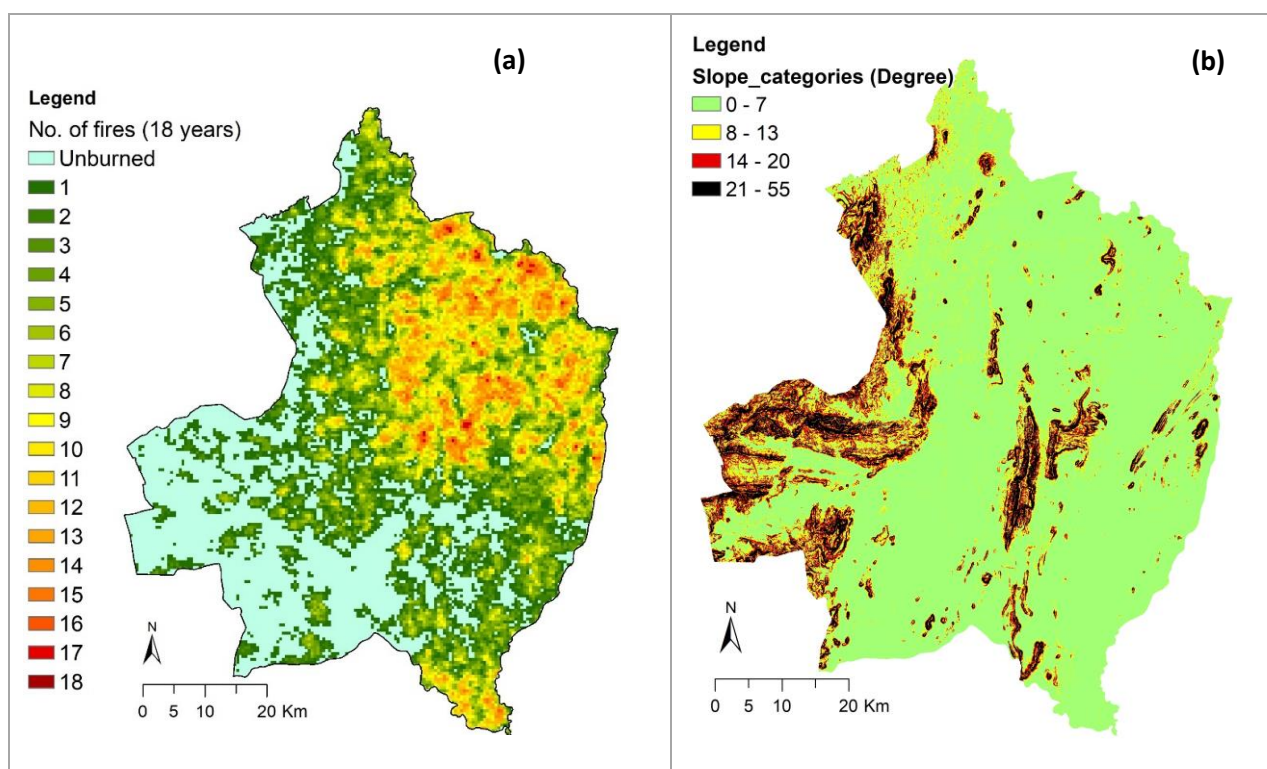

**Figure S2.** Fire frequency (2001-2018) (a) and slope map category (b) for the study area

**Table S1.** Accuracy assessment of classification results based on confusion matrix for 2001, 2008 and 2018

|               | Dense mi-<br>ombo | Opened mi-<br>ombo | Others | Agriculture | Body wa-<br>ters | Total | UA (%) |
|---------------|-------------------|--------------------|--------|-------------|------------------|-------|--------|
| <b>2001</b>   |                   |                    |        |             |                  |       |        |
| Dense miombo  | 39                | 1                  | 0      | 0           | 0                | 40    | 97.50  |
| Opened miombo | 2                 | 166                | 2      | 19          | 0                | 189   | 87.83  |
| Others        | 0                 | 0                  | 24     | 2           | 0                | 26    | 92.31  |
| Agriculture   | 0                 | 7                  | 12     | 115         | 1                | 135   | 85.19  |
| Body waters   | 0                 | 0                  | 0      | 0           | 6                | 6     | 1.00   |
| <b>total</b>  | 41                | 174                | 38     | 136         | 7                | 396   |        |
| <b>PA (%)</b> | 95.12             | 95.40              | 63.16  | 84.56       | 85.71            |       | 88.38  |
| <b>OA (%)</b> | 88.39             |                    |        |             |                  |       |        |
| <b>Kappa</b>  | 0.82              |                    |        |             |                  |       |        |
| <b>2008</b>   |                   |                    |        |             |                  |       |        |
| Dense miombo  | 41                | 2                  | 0      | 3           | 0                | 46    | 89.13  |
| Opened miombo | 0                 | 106                | 6      | 25          | 0                | 137   | 77.37  |
| Others        | 1                 | 0                  | 20     | 3           | 0                | 24    | 83.33  |
| Agriculture   | 0                 | 3                  | 2      | 179         | 1                | 185   | 96.76  |
| Body waters   | 0                 | 0                  | 0      | 0           | 4                | 4     | 1.00   |
| <b>Total</b>  | 42                | 111                | 28     | 210         | 5                | 396   |        |
| <b>PA (%)</b> | 97.62             | 95.49              | 71.43  | 85.24       | 80.00            |       | 88.38  |
| <b>OA (%)</b> | 88.39             |                    |        |             |                  |       |        |
| <b>Kappa</b>  | 0.82              |                    |        |             |                  |       |        |
| <b>2018</b>   |                   |                    |        |             |                  |       |        |
| Dense miombo  | 32                | 0                  | 0      | 0           | 0                | 32    | 1.00   |
| Opened miombo | 1                 | 82                 | 0      | 9           | 0                | 92    | 89.13  |
| Others        | 0                 | 3                  | 22     | 2           | 0                | 27    | 81.48  |
| Agriculture   | 4                 | 23                 | 13     | 200         | 0                | 240   | 83.33  |
| Body waters   | 0                 | 0                  | 0      | 0           | 5                | 5     | 1.00   |
| <b>Total</b>  | 37                | 108                | 35     | 211         | 5                | 396   |        |
| <b>PA (%)</b> | 86.49             | 75.93              | 62.86  | 94.79       | 1.00             |       | 86.11  |
| <b>OA (%)</b> | 86.10             |                    |        |             |                  |       |        |
| <b>Kappa</b>  | 0.77              |                    |        |             |                  |       |        |

**Table S2.** Accuracy assessment of the fire frequency map based on confusion matrix

|          | Unburned     | Burned | Total | UA (%) |
|----------|--------------|--------|-------|--------|
| Unburned | 301          | 4      | 305   | 98.69  |
| Burned   | 17           | 74     | 91    | 81.32  |
| Total    | 318          | 78     | 396   |        |
| PA (%)   | 94.65        | 94.87  |       | 94.69  |
| OA (%)   | <b>94.70</b> |        |       |        |

Kappa

0.84

**Table S3.** OLS and GWR results of the grid size cells tested under the parameters in analysis

| Grid size cell<br>(m) | Miombo type   | OLS            |          | GWR            |           |          |          |
|-----------------------|---------------|----------------|----------|----------------|-----------|----------|----------|
|                       |               | R <sup>2</sup> | AICc     | R <sup>2</sup> | AICc      | Moran    | P-value  |
| 500                   | Dense miombo  | 0.36           | 11346.14 | 0.65           | 9,487.16  | 0.000776 | 0.697663 |
|                       | Opened miombo | 0.38           | 32115.96 | 0.81           | 15,046.00 | 0.000000 | 0.014347 |
| 750                   | Dense miombo  | 0.34           | 6725.70  | 0.61           | 5,560.37  | 0.004480 | 0.163006 |
|                       | Opened miombo | 0.82           | 6898.34  | 0.92           | 3,208.88  | 0.045823 | 0.000000 |
| 1000                  | Dense miombo  | 0.35           | 4605.88  | 0.67           | 3,739.38  | 0.001199 | 0.795935 |
|                       | Opened miombo | 0.84           | 3742.80  | 0.93           | 4,514.36  | 0.007595 | 0.118325 |

**Table S4.** Summary of OLS Results – model variable\_for dense miombo

| Variable                     | Coefficient | StdError | t-Statistic                                           | Probabil-<br>ity | Ro-<br>bust_SE | Robust_t  | Ro-<br>bust_Pr | VIF   |
|------------------------------|-------------|----------|-------------------------------------------------------|------------------|----------------|-----------|----------------|-------|
| Intercept                    | 9.601835    | 0.583714 | 16.449545                                             | 0.000*           | 0.558458       | 17.193489 | 0.000*         | ----- |
| Agriculture                  | 0.246033    | 0.009925 | 24.790223                                             | 0.000*           | 0.013083       | 18.805528 | 0.000*         | 1.003 |
| Slope                        | 0.713060    | 0.033013 | 21.599679                                             | 0.000*           | 0.040154       | 17.758023 | 0.000*         | 1.003 |
| Fire frequency               | 0.003745    | 0.014020 | 0.267135                                              | 0.789400         | 0.016943       | 0.221054  | 0.825073       | 1.006 |
| <b>OLS Diagnostics</b>       |             |          |                                                       |                  |                |           |                |       |
| Number of Ob-<br>servations: | 1916        |          | Akaike's In-<br>formation<br>Criterion<br>(AICc):     | 14964.349        |                |           |                |       |
| Multiple R-<br>Squared:      | 0.355       |          | Adjusted R-<br>Squared:                               | 0.354            |                |           |                |       |
| Joint F-Statistic:           | 351.477     |          | Prob(>F),<br>(3,3727)<br>degrees of<br>freedom:       | 0.000*           |                |           |                |       |
| Joint Wald Sta-<br>tistic:   | 563.626     |          | Prob(>chi-<br>squared),<br>(3) degrees<br>of freedom: | 0.000*           |                |           |                |       |
| Koenker (BP)<br>Statistic:   | 75.641      |          | Prob(>chi-<br>squared),<br>(3) degrees<br>of freedom: | 0.000*           |                |           |                |       |

---

|                           |          |                                                   |        |
|---------------------------|----------|---------------------------------------------------|--------|
| Jarque-Bera<br>Statistic: | 1171.271 | Prob(>chi-squared),<br>(2) degrees<br>of freedom: | 0.000* |
|---------------------------|----------|---------------------------------------------------|--------|

---

**Table S5.** Summary of OLS Results – model variable\_for opened miombo

| Variable                | Coefficient | StdError | t-Statistic                                 | Probability | Robust_SE | Robust_t | Robust_Pr | VIF   |
|-------------------------|-------------|----------|---------------------------------------------|-------------|-----------|----------|-----------|-------|
| Intercept               | -5.668      | 0.357637 | -15.849                                     | 0.000*      | 0.384     | -14.771  | 0.000*    | ----- |
| Agriculture             | -0.874      | 0.006319 | -138.328                                    | 0.000*      | 0.008     | -110.247 | 0.000*    | 1.005 |
| Fire frequency          | -0.003      | 0.010159 | -0.343                                      | 0.732       | 0.013     | -0.272   | 0.786     | 1.012 |
| Slope                   | 0.6417      | 0.027026 | 23.747                                      | 0.000*      | 0.039     | 16.475   | 0.000*    | 1.008 |
| <b>OLS Diagnostics</b>  |             |          |                                             |             |           |          |           |       |
| Number of Observations: | 3731        |          | Akaike's Information Criterion (AICc):      | 28626.589   |           |          |           |       |
| Multiple R-Squared:     | 0.841       |          | Adjusted R-Squared:                         | 0.841       |           |          |           |       |
| Joint F-Statistic:      | 6559.729    |          | Prob(>F), (3,3727) degrees of freedom:      | 0.000*      |           |          |           |       |
| Joint Wald Statistic:   | 14248.968   |          | Prob(>chi-squared), (3) degrees of freedom: | 0.000*      |           |          |           |       |
| Koenker (BP) Statistic: | 202.521     |          | Prob(>chi-squared), (3) degrees of freedom: | 0.000*      |           |          |           |       |
| Jarque-Bera Statistic:  | 6325.155    |          | Prob(>chi-squared), (2) degrees of freedom: | 0.000*      |           |          |           |       |

---

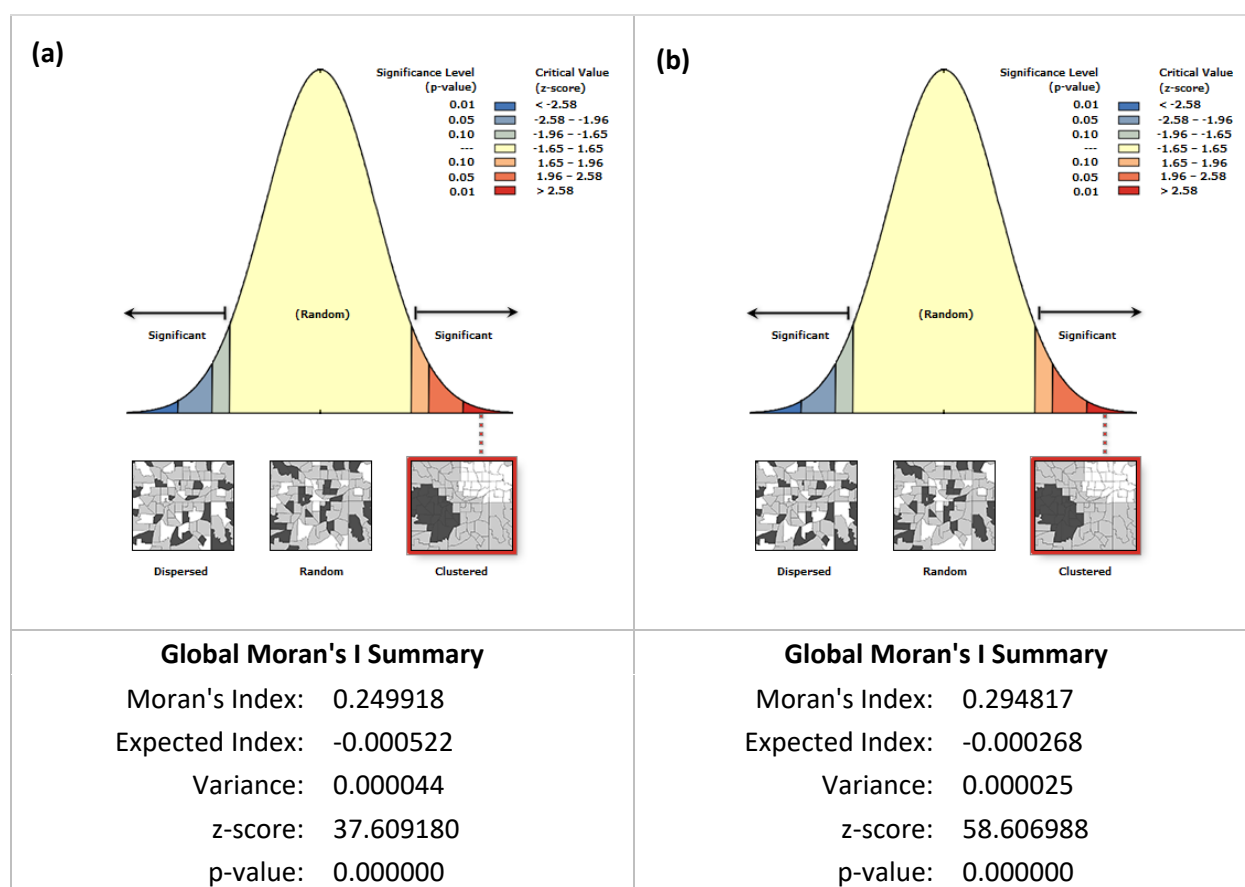

**Figure S3.** OLS Spatial autocorrelation report for dense miombo **a)** and opened miombo **b)**

**Table S6.** Geographically weighted regression (GWR) Results for dense miombo

|                                            |                   |
|--------------------------------------------|-------------------|
| Coordinates type:                          | Projected         |
| Spatial kernel:                            | Adaptive bisquare |
| Criterion for optimal bandwidth:           | AICc              |
| Bandwidth used:                            | 58.000            |
| <b>Diagnostic information</b>              |                   |
| Residual sum of squares:                   | 529.333           |
| Effective number of parameters (trace(S)): | 318.273           |
| Degree of freedom (n - trace(S)):          | 1597.727          |
| Sigma estimate:                            | 0.576             |
| Log-likelihood:                            | -1486.338         |
| Degree of Dependency (DoD):                | 0.421             |

---

|                              |          |
|------------------------------|----------|
| AIC:                         | 3611.221 |
| AICc:                        | 3739.381 |
| BIC:                         | 5385.737 |
| R2:                          | 0.724    |
| Adj. R2:                     | 0.669    |
| Adj. alpha (95%):            | 0.001    |
| Adj. critical t value (95%): | 3.425    |

---

#### Summary statistics for GWR parameter estimates

| Variable       | Mean   | STD   | Min    | Median | Max   |
|----------------|--------|-------|--------|--------|-------|
| Intercept      | -0.052 | 0.455 | -1.431 | 0.018  | 0.947 |
| Agriculture    | -0.463 | 0.449 | -1.905 | -0.319 | 0.389 |
| Fire frequency | 0.035  | 0.187 | -1.691 | 0.032  | 0.775 |
| Slope          | -0.288 | 0.280 | -1.365 | -0.243 | 0.400 |

**Table A7.** Geographically weighted regression (GWR) Results for dense miombo

|                                  |                   |
|----------------------------------|-------------------|
| Coordinates type:                | Projected         |
| Spatial kernel:                  | Adaptive bisquare |
| Criterion for optimal bandwidth: | AICc              |
| Bandwidth used:                  | 69.000            |

#### Diagnostic information

|                                            |          |
|--------------------------------------------|----------|
| Residual sum of squares:                   | 231.749  |
| Effective number of parameters (trace(S)): | 521.085  |
| Degree of freedom (n - trace(S)):          | 3209.915 |
| Sigma estimate:                            | 0.269    |
| Log-likelihood:                            | -110.252 |
| Degree of Dependency (DoD):                | 0.408    |
| AIC:                                       | 1264.674 |
| AICc:                                      | 1434.938 |
| BIC:                                       | 4514.359 |

---

|                              |       |
|------------------------------|-------|
| R2:                          | 0.938 |
| Adj. R2:                     | 0.928 |
| Adj. alpha (95%):            | 0.000 |
| Adj. critical t value (95%): | 3.554 |

### Summary statistics for GWR parameter estimates

| Variable       | Mean   | STD   | Min    | Median | Max    |
|----------------|--------|-------|--------|--------|--------|
| Intercept      | 0.053  | 0.262 | -0.766 | -0.000 | 1.055  |
| Agriculture    | -0.822 | 0.257 | -1.476 | -0.927 | -0.020 |
| Fire frequency | -0.016 | 0.079 | -0.368 | -0.013 | 0.843  |
| Slope          | 0.100  | 0.136 | -0.136 | 0.082  | 0.711  |

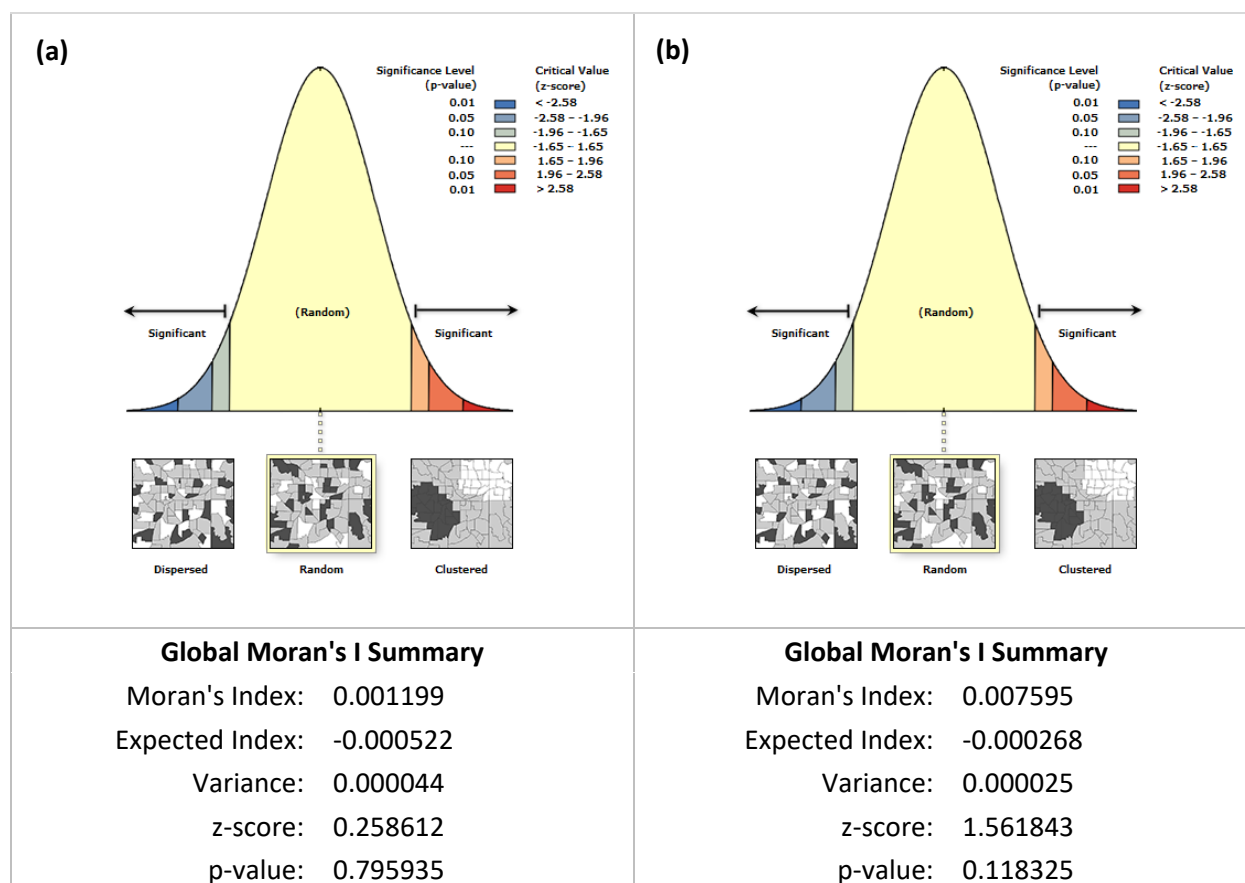

**Figure S4.** GWR Spatial autocorrelation report for dense miombo **a)** and opened miombo **b)**
